# Supplementary material for: Genome-wide RNAi selection identifies a regulator of transmission stage-enriched gene families and cell-type differentiation in Trypanosoma brucei
Source: PLoS Pathog. 2017 Mar 23;13(3):e1006279. doi: 10.1371/journal.ppat.1006279 (PMC5380359; doi:10.1371/journal.ppat.1006279)
Supplement: S1 Table — DRBD5, ZFP3 and REG9.1 are highlighted. (XLSX) [file ppat.1006279.s001.xlsx]

## Sheet: Combined_CDS_rankings
Gene	Description	Replicate1_Tags	Replicate1_Rank	Replicate 2_Tags	Replicate 2_Rank	TotalTags	RankDifference	Note	tested in an independent RNAi line	RNAi effective by northern blotting?	Increased G418 Resistance?	Growth defect
Tb927.9.16260	expression site-associated gene 3 (ESAG3, pseudogene), putative	568494	1	191244	1	759738	0
Tb927.9.6380	hypothetical protein, conserved	246584	2	87604	2	334188	0
Tb927.9.6360	hypothetical protein, conserved	175882	3	62461	3	238343	0
Tb927.3.3000	flagellar transport protein, putative	160149	4	60981	4	221130	0
Tb927.11.12470	hypothetical protein, conserved	108525	5	41978	6	150503	1		Yes	Yes	Yes	Strong
Tb927.9.6370	hypothetical protein, conserved	69486	6	23424	9	92910	3
Tb927.5.3160	protein kinase, putative	52806	7	26604	8	79410	1		Yes	Yes	No
Tb927.3.720	zinc finger protein 2, putative (ZFP3)	37118	8	43034	5	80152	-3	ZFP3	Yes	Yes	Yes
Tb927.3.3020	actin-like protein, putative	35118	9	12720	10	47838	1
Tb11.v5.0714	RNA-binding protein, putative	33509	10	5682	14	39191	4		Yes	Partial (~50% reduction)	Yes but not strong
Tb927.3.3010	hypothetical protein, conserved	25325	11	8549	13	33874	2
Tb927.6.3480	RNA-binding protein, putative	25280	12	9034	12	34314	0	DRDB5	Yes	Yes	Yes
Tb927.7.6790	hypothetical protein, conserved	16196	13	10395	11	26591	-2		Yes	Partial (~50% reduction)	No
Tb927.11.14220	hypothetical protein, conserved	15921	14	36669	7	52590	-7	REG9.1	Yes	Yes	Yes
Tb927.4.3190	ubiquitin-conjugating enzyme E2, putative	6208	15	4375	16	10583	1		Yes	Yes	No
Tb927.2.3090	hypothetical protein, conserved	4787	16	3958	17	8745	1
Tb927.11.14010	hypothetical protein, conserved	4722	17	1148	25	5870	8
Tb927.11.5940	receptor-type adenylate cyclase GRESAG 4, putative	4376	18	4554	15	8930	-3		Yes	Yes	No
Tb927.9.17350	variant surface glycoprotein (VSG, pseudogene), putative	3815	19	3367	18	7182	-1
Tb11.v5.0117	variant surface protein (VSG), putative	3794	20	3197	19	6991	-1
Tb927.2.6410	variant surface glycoprotein (VSG, atypical), putative	2912	21	2722	20	5634	-1
Tb927.11.2430	Cytoplasmic dynein 2 heavy chain (DYNC2H1), putative	2195	22	1541	22	3736	0
Tb927.7.5230	lanosterol synthase	2018	23	1739	21	3757	-2
Tb927.8.2890	hypothetical protein, conserved	1710	24	785	27	2495	3		Yes	No	No
Tb927.10.10810	adenosine deaminase-like protein	1348	25	1034	26	2382	1
Tb927.2.2320	hypothetical protein	1056	26	1412	23	2468	-3
Tb927.10.7170	hypothetical protein	762	27	443	31	1205	4
Tb927.1.2610	hypothetical protein, unlikely	676	28	749	28	1425	0		Yes	No	No
Tb927.10.3820	hypothetical protein, conserved	648	29	508	30	1156	1
Tb927.2.4990	hypothetical protein, conserved	591	30	367	35	958	5
Tb927.10.2810	hypothetical protein, conserved	581	31	377	32	958	1
Tb927.10.15070	hypothetical protein, conserved	545	32	602	29	1147	-3
Tb927.10.15030	hypothetical protein	471	33	337	38	808	5
Tb927.4.1530	hypothetical protein, conserved	454	34	372	33	826	-1		Yes	transcript not detected	No
Tb927.7.2610	hypothetical protein, conserved	438	35	286	40	724	5
Tb927.7.6850	trans-sialidase	432	36	363	36	795	0		Yes	Partial (~50% reduction)	No
Tb927.2.660	expression site-associated gene (ESAG, pseudogene), putative	427	37	143	51	570	14
Tb927.10.3980	hypothetical protein	419	38	370	34	789	-4
Tb927.6.100	receptor-type adenylate cyclase GRESAG 4, pseudogene, putative	417	39	164	47	581	8
Tb927.2.1260	expression site-associated gene (ESAG, pseudogene), putative	407	40	153	48	560	8
Tb927.3.2990	hypothetical protein, conserved	348	41	101	60	449	19
Tb927.9.7220	hypothetical protein, unlikely	342	42	119	53	461	11
Tb927.11.6820	hypothetical protein, conserved	330	43	226	41	556	-2
Tb927.11.3780	subtilisin-like serine peptidase	325	44	144	49	469	5
Tb927.11.11530	histone acetyltransferase, putative	316	45	323	39	639	-6
Tb927.10.10240	procyclin-associated gene 1 (PAG1) protein	280	46	199	42	479	-4
Tb927.6.3690	pre-mRNA cleavage complex II Clp1-like, conserved	277	47	351	37	628	-10
Tb927.9.4110	hypothetical protein, unlikely	277	48	106	57	383	9
Tb11.01.2730	hypothetical protein, conserved	267	49	178	45	445	-4
Tb927.10.2820	hypothetical protein, conserved	263	50	196	43	459	-7
Tb927.10.14450	hypothetical protein, conserved	255	51	106	55	361	4
Tb927.10.3900	protein kinase, putative	232	52	1308	24	1540	-28
Tb11.02.5120b	mitochondrial edited mRNA stability factor 1 subunit, putative	202	53	105	58	307	5
Tb927.11.7218	mitochondrial edited mRNA stability factor 1 subunit	200	54	106	56	306	2
Tb927.3.730	hypothetical protein, conserved	186	55	165	46	351	-9
Tb927.10.10860	hypothetical protein, unlikely	181	56	102	59	283	3
Tb927.3.1290	cullin 4B, putative	167	57	62	75	229	18
Tb927.11.16780	hypothetical protein	155	58	76	68	231	10
Tb927.9.11550	hypothetical protein, unlikely	134	59	52	85	186	26
Tb927.2.910	expression site-associated gene (ESAG, pseudogene), putative	128	60	39	95	167	35
Tb11.v5.0815	hypothetical protein, conserved	118	61	192	44	310	-17
Tb927.11.13210	hypothetical protein, conserved	118	62	93	61	211	-1
Tb927.11.2370	hypothetical protein, conserved	117	63	42	92	159	29
Tb11.v5.0900	hypothetical protein, conserved	115	64	72	70	187	6
Tb927.4.100	retrotransposon hot spot protein (RHS, pseudogene), putative	104	65	86	62	190	-3
Tb927.4.3750	receptor-type adenylate cyclase GRESAG 4, putative	101	66	78	66	179	0
Tb927.11.6550	PUF nine target 1	99	67	55	82	154	15
Tb11.v5.0901	tubulin-tyrsoine ligase-like protein, putative	97	68	69	72	166	4
Tb927.10.12790	hypothetical protein	91	69	109	54	200	-15
Tb927.10.12760	zinc finger protein family member, putative	89	70	39	94	128	24
Tb927.4.3180	hypothetical protein, conserved	89	71	70	71	159	0
Tb927.11.6810	tubulin-tyrsoine ligase-like protein, putative	88	72	59	77	147	5
Tb927.10.7160	procyclin-associated gene 1 (PAG1) protein, putative	85	73	58	78	143	5
Tb927.10.1710	DNA polymerase eta, putative	83	74	83	63	166	-11
Tb927.4.2880	Nucleoporin	81	75	79	65	160	-10
Tb927.8.1660	procyclin-associated gene (pseudogene), putative	81	76	49	88	130	12
Tb927.9.11670	hypothetical protein, conserved	80	77	31	104	111	27
Tb927.11.2720	hypothetical protein, conserved	79	78	75	69	154	-9
Tb927.7.2600	hypothetical protein, conserved	78	79	68	74	146	-5
Tb927.10.12770	hypothetical protein	73	80	34	98	107	18
Tb927.8.7090	hypothetical protein, conserved	71	81	36	97	107	16
Tb927.6.3680	hypothetical protein, conserved	64	82	55	83	119	1
Tb927.6.3700	hypothetical protein, conserved	61	83	51	86	112	3
Tb11.v5.0482	hypothetical protein, conserved	59	84	61	76	120	-8
Tb927.11.9950	hypothetical protein, conserved	55	85	132	52	187	-33
Tb927.8.990	RNA-binding protein 33 (RNA-binding motif protein 33)	55	86	44	91	99	5
Tb927.11.5470	hypothetical protein, conserved	53	87	68	73	121	-14
Tb927.1.240	retrotransposon hot spot protein (RHS, pseudogene), putative	48	88	27	108	75	20
Tb927.4.2280	hypothetical protein, conserved	47	89	21	127	68	38
Tb927.1.2680	hypothetical protein, unlikely	46	90	50	87	96	-3
Tb927.9.680	expression site-associated gene (ESAG, pseudogene), putative	46	91	0	0	46	-91
Tb927.10.1720	ATP-dependent DEAD/H RNA helicase, putative	44	92	33	99	77	7
Tb927.4.2270	hypothetical protein, conserved	44	93	12	167	56	74
Tb927.3.5520	26S proteasome regulatory non-ATPase subunit	43	94	13	160	56	66
Tb927.9.10020	hypothetical protein, unlikely	43	95	13	162	56	67
Tb927.9.17310	variant surface glycoprotein (VSG, pseudogene), putative	43	96	0	0	43	-96
Tb11.1751	hypothetical protein (pseudogene)	42	97	7	200	49	103
Tb927.2.560	retrotransposon hot spot protein 4 (RHS4), putative	42	98	29	106	71	8
Tb927.11.5480	phosphotransferase, putative	40	99	53	84	93	-15
Tb927.8.2460	hypothetical protein, conserved	40	100	33	101	73	1
Tb927.9.4830	hypothetical protein, unlikely	40	101	15	148	55	47
Tb927.2.820	retrotransposon hot spot protein (RHS, pseudogene), putative	38	102	37	96	75	-6
Tb927.5.295b	retrotransposon hotspot (RHS) protein 1	38	103	57	79	95	-24
Tb927.7.6700	hypothetical protein	38	104	56	81	94	-23
Tb927.10.15630	hypothetical protein, unlikely	37	105	19	131	56	26
Tb927.10.9710	hypothetical protein	37	106	26	113	63	7
Tb927.1.500	retrotransposon hot spot protein (RHS, pseudogene), putative	36	107	16	142	52	35
Tb927.9.2240	protein kinase, putative	35	108	144	50	179	-58
Tb927.10.6610	chaperone protein DNAj, putative	34	109	5	224	39	115
Tb927.11.20600	variant surface glycoprotein (VSG, pseudogene), putative	34	110	17	137	51	27
Tb927.8.6800	hypothetical protein, conserved	34	111	16	144	50	33
Tb927.6.160	retrotransposon hot spot protein 1 (RHS1), putative	33	112	25	115	58	3
Tb927.7.1680	hypothetical protein, conserved	33	113	30	105	63	-8
Tb927.1.1280	hypothetical protein, unlikely	32	114	82	64	114	-50
Tb927.1.4910	expression site-associated gene (ESAG) protein, putative	32	115	24	117	56	2
Tb11.v5.1021	variant surface glycoprotein (VSG), putative	31	116	22	121	53	5
Tb927.1.450	retrotransposon hot spot protein (RHS, pseudogene), putative	31	117	23	120	54	3
Tb11.v5.0624	retrotransposon hot spot protein (PHS), putative	30	118	25	114	55	-4
Tb927.4.2600	hypothetical protein, conserved	30	119	20	129	50	10
Tb927.9.15840	hypothetical protein, unlikely	30	120	27	110	57	-10
Tb927.1.4310	hypothetical protein, conserved	29	121	27	109	56	-12
Tb11.v5.0214	retrotransposon hot spot (RHS) protein, putative	28	122	56	80	84	-42
Tb927.8.3630	folate transporter, putative	28	123	22	124	50	1
Tb927.10.9340	hypothetical protein	27	124	13	158	40	34
Tb927.3.1440	AAA ATPase, putative	27	125	11	173	38	48
Tb927.2.100	retrotransposon hot spot protein 1 (RHS1), putative	26	126	24	118	50	-8
Tb927.2.2060	variant surface glycoprotein (VSG)-related, putative	26	127	5	227	31	100
Tb927.1.2690	hypothetical protein, unlikely	25	128	18	133	43	5
Tb927.1.430	retrotransposon hot spot protein (RHS, pseudogene), putative	24	129	8	196	32	67
Tb927.3.3410	aspartyl aminopeptidase, putative	24	130	15	146	39	16
Tb927.4.3460	ubiquitin-conjugating enzyme E2, putative	24	131	15	147	39	16
Tb927.11.6540	hypothetical protein, conserved	23	132	21	126	44	-6
Tb927.1.5200	expression site-associated gene (ESAG) protein, putative	23	133	14	153	37	20
Tb927.8.6200	tubulin folding cofactor D, putative	23	134	18	135	41	1
Tb927.1.2170	hypothetical protein, unlikely	22	135	12	165	34	30
Tb927.1.2280	hypothetical protein, unlikely	22	136	11	172	33	36
Tb11.v5.0575	hypothetical protein, conserved	21	137	5	222	26	85
Tb11.v5.0776	variant surface glycoprotein (VSG) pseudogene, putative	21	138	24	116	45	-22
Tb927.1.1250	hypothetical protein, unlikely	21	139	17	138	38	-1
Tb927.11.5550	DNA polymerase theta, putative	21	140	7	201	28	61
Tb927.8.7080	hypothetical protein, conserved	21	141	13	161	34	20
Tb927.9.17930	variant surface glycoprotein (VSG, pseudogene), putative	21	142	19	132	40	-10
Tb11.v5.0799	hypothetical protein, conserved	20	143	26	112	46	-31
Tb927.10.6240	ras-like small GTPase, putative	20	144	33	100	53	-44
Tb927.1.990	hypothetical protein, conserved	20	145	0	0	20	-145
Tb927.1.1950	hypothetical protein, unlikely	19	146	22	123	41	-23
Tb927.1.2250	hypothetical protein, unlikely	19	147	10	178	29	31
Tb927.1.300	retrotransposon hot spot protein (RHS, pseudogene), putative	19	148	9	186	28	38
Tb927.9.3680	hypothetical protein, conserved	19	149	13	163	32	14
Tb11.v5.0630	hypothetical protein, conserved	18	150	14	149	32	-1
Tb927.1.1290	hypothetical protein, unlikely	18	151	2	297	20	146
Tb927.8.2470	hypothetical protein, conserved	18	152	21	128	39	-24
Tb11.v5.0326	retrotransposon hot spot (RHS) protein, putative	17	153	39	93	56	-60
Tb11.v5.0768	aspartyl aminopeptidase, putative	17	154	14	150	31	-4
Tb927.10.12250	hypothetical protein, conserved	17	155	10	177	27	22
Tb927.1.4280	hypothetical protein, conserved	17	156	9	187	26	31
Tb927.3.1640	hypothetical protein	17	157	13	159	30	2
Tb927.4.3880	receptor-type adenylate cyclase GRESAG 4, putative	17	158	12	168	29	10
Tb927.8.4300	hypothetical protein	17	159	6	220	23	61
Tb927.3.4610	hypothetical protein, conserved	16	160	31	103	47	-57
Tb927.10.4420	hypothetical protein	15	161	22	122	37	-39
Tb927.11.10150	hypothetical protein, conserved	15	162	23	119	38	-43
Tb927.11.12950	ras-like small GTPase, putative	15	163	6	212	21	49
Tb927.3.1330	hypothetical protein, conserved	15	164	10	179	25	15
Tb11.v5.0599	variant surface glycoprotein (VSG), putative	14	165	12	164	26	-1
Tb927.3.4960	kinesin, putative	14	166	5	229	19	63
Tb927.8.5630	dihydroorotase, putative	14	167	2	337	16	170
Tb927.11.12940	hypothetical protein, conserved	13	168	21	125	34	-43
Tb927.11.6960	ATG16/SAP18/CVT11/APG16, putative	13	169	46	89	59	-80
Tb927.4.3860	receptor-type adenylate cyclase GRESAG 4, putative	13	170	5	230	18	60
Tb927.6.5150	hypothetical protein, conserved	13	171	14	155	27	-16
Tb04.3I12.100	hypothetical protein	12	172	8	189	20	17
Tb927.11.18610	retrotransposon hot spot protein (RHS, pseudogene), putative	12	173	3	259	15	86
Tb927.11.5330	hypothetical protein, conserved	12	174	15	145	27	-29
Tb927.11.7216	cell division cycle 6 (CDC6), putative;current=false	12	175	9	185	21	10
Tb927.1.230	hypothetical protein, unlikely	12	176	77	67	89	-109
Tb927.9.15310	hypothetical protein, unlikely	12	177	28	107	40	-70
Tb11.v5.0505	hypothetical protein, conserved	11	178	26	111	37	-67
Tb11.v5.1024	variant surface glycoprotein (VSG, atypical), putative	11	179	1	367	12	188
Tb927.10.14400	hypothetical protein, conserved	11	180	11	170	22	-10
Tb927.10.6250	hypothetical protein, conserved	11	181	16	141	27	-40
Tb927.1.1940	hypothetical protein, unlikely	11	182	5	226	16	44
Tb927.1.4200	hypothetical protein, unlikely	11	183	8	195	19	12
Tb11.1780	retrotransposon hot spot protein 1 (RHS1, pseudogene), putative	10	184	8	190	18	6
Tb11.v5.0119	variant surface glycoprotein (VSG), pseudogene	10	185	13	157	23	-28
Tb927.10.12240	short-chain dehydrogenase, putative	10	186	9	182	19	-4
Tb927.11.14560	cleavage and polyadenylation specificity factor-like protein, putative	10	187	8	193	18	6
Tb927.1.1780	hypothetical protein, unlikely	10	188	7	202	17	14
Tb927.1.200	hypothetical protein, unlikely	10	189	32	102	42	-87
Tb927.5.2400	ubiquitin carboxyl-terminal hydrolase, putative	10	190	12	169	22	-21
Tb927.8.7800	hypothetical protein, conserved	10	191	20	130	30	-61
Tb11.v5.0606	hypothetical protein, conserved	9	192	1	360	10	168
Tb927.11.14120	phenylalanyl-tRNA synthetase alpha chain, putative	9	193	4	236	13	43
Tb927.11.18630	ingi-related retroposon, putative (pseudogene)	9	194	4	240	13	46
Tb927.1.3150	hypothetical protein, conserved	9	195	8	194	17	-1
Tb927.8.5790	hypothetical protein	9	196	1	528	10	332
Tb11.v5.0280	hypothetical protein, conserved	8	197	10	176	18	-21
Tb927.10.10790	hypothetical protein	8	198	3	254	11	56
Tb927.10.9900	ABC1 protein, putative	8	199	0	0	8	-199
Tb927.11.1610	hypothetical protein, conserved	8	200	11	171	19	-29
Tb927.1.4620	hypothetical protein, conserved	8	201	3	263	11	62
Tb927.7.6450	tRNA-dihydrouridine synthase 3, putative	8	202	1	517	9	315
Tb927.7.6780	hypothetical protein	8	203	3	279	11	76
Tb927.8.3620	folate transporter, putative	8	204	17	140	25	-64
Tb927.8.940	hypothetical protein, conserved	8	205	2	342	10	137
Tb11.02.5110b	cell division cycle 6 (CDC6), putative;current=false	7	206	6	209	13	3
Tb11.v5.0752	expression site-associated gene 3 (ESAG3) protein, putative	7	207	0	0	7	-207
Tb927.10.2380	hypothetical protein, conserved	7	208	3	257	10	49
Tb927.10.5790	hypothetical protein, conserved	7	209	0	0	7	-209
Tb927.11.18600	variant surface glycoprotein (VSG), putative	7	210	4	239	11	29
Tb927.1.1590	hypothetical protein, unlikely	7	211	2	300	9	89
Tb927.3.1320	hypothetical protein, conserved	7	212	7	204	14	-8
Tb927.7.710	heat shock 70 kDa protein, putative	7	213	7	207	14	-6
Tb927.8.3650	folate transporter, putative	7	214	11	175	18	-39
Tb927.9.4370	GTPase activating protein, putative	7	215	1	544	8	329
Tb927.9.5700	hypothetical protein, conserved	7	216	0	0	7	-216
Tb11.v5.0831	hypothetical protein, conserved	6	217	2	288	8	71
Tb927.11.280	hypothetical protein, conserved	6	218	14	152	20	-66
Tb927.11.4000	hypothetical protein, conserved	6	219	4	242	10	23
Tb927.11.450	hypothetical protein, conserved	6	220	1	429	7	209
Tb927.1.2220	hypothetical protein, unlikely	6	221	2	307	8	86
Tb927.6.3430	protein kinase, putative	6	222	0	0	6	-222
Tb927.7.7260	kinesin, putative	6	223	17	139	23	-84
Tb927.8.3760	hypothetical protein	6	224	1	524	7	300
Tb927.8.5640	hypothetical protein, conserved	6	225	2	338	8	113
Tb927.9.1750	hypothetical protein, conserved	6	226	2	345	8	119
Tb927.9.7450	hypothetical protein, unlikely	6	227	6	221	12	-6
Tb927.9.7500	hypothetical protein	6	228	3	285	9	57
Tb11.02.5390b	mRNA processing protein, putative	5	229	0	0	5	-229
Tb11.v5.0594	retrotransposon hot spot (RHS) protein, putative	5	230	8	191	13	-39
Tb927.10.12230	hypothetical protein, conserved	5	231	8	192	13	-39
Tb927.11.1690	hypothetical protein, conserved	5	232	0	0	5	-232
Tb927.11.19820	hypothetical protein	5	233	0	0	5	-233
Tb927.1.1260	hypothetical protein, unlikely	5	234	1	422	6	188
Tb927.11.7400	hypothetical protein, conserved	5	235	0	0	5	-235
Tb927.1.2620	hypothetical protein, unlikely	5	236	0	0	5	-236
Tb927.2.1210	retrotransposon hot spot protein 4 (RHS4), putative	5	237	8	198	13	-39
Tb927.2.280	retrotransposon hot spot protein 2 (RHS2), putative	5	238	3	265	8	27
Tb927.2.380	retrotransposon hot spot protein 2 (RHS2), putative	5	239	8	199	13	-40
Tb927.3.200	variant surface glycoprotein (VSG, pseudogene), putative	5	240	14	154	19	-86
Tb927.5.1850	hypothetical protein, conserved	5	241	4	248	9	7
Tb927.5.3240	hypothetical protein, conserved	5	242	4	249	9	7
Tb927.6.2710	hypothetical protein, conserved	5	243	3	276	8	33
Tb927.6.400	peptidase M20/M25/M40, putative	5	244	4	251	9	7
Tb927.7.5190	hypothetical protein, conserved	5	245	3	277	8	32
Tb927.8.2480	3-oxo-5-alpha-steroid 4-dehydrogenase-like, putative	5	246	6	219	11	-27
Tb927.8.5110	hypothetical protein, conserved	5	247	3	281	8	34
Tb927.8.960	hypothetical protein, conserved	5	248	5	231	10	-17
Tb927.9.11860	hypothetical protein, unlikely	5	249	3	282	8	33
Tb927.9.7170	hypothetical protein, conserved	5	250	1	546	6	296
Tb11.1340	hypothetical protein	4	251	0	0	4	-251
Tb11.v5.0785	variant surface glycoprotein (VSG), putative	4	252	5	223	9	-29
Tb927.10.12400	membrane transporter protein, putative	4	253	1	372	5	119
Tb927.10.2370	RNA-binding protein, putative	4	254	1	384	5	130
Tb927.11.13920	kinesin-II 85 Kd subunit, putative	4	255	0	0	4	-255
Tb927.11.19850	hypothetical protein	4	256	1	421	5	165
Tb927.11.19970	variant surface glycoprotein (VSG, pseudogene), putative	4	257	5	225	9	-32
Tb927.11.6270	inositol-1,4,5-trisphosphate (IP3) 5-phosphatase, putative	4	258	6	214	10	-44
Tb927.11.7080	acidocalcisomal pyrophosphatase	4	259	3	262	7	3
Tb927.11.8990	cation transporter, putative	4	260	4	244	8	-16
Tb927.1.350	retrotransposon hot spot protein (RHS, pseudogene), putative	4	261	0	0	4	-261
Tb927.1.4870	expression site-associated gene (ESAG) protein, putative	4	262	4	246	8	-16
Tb927.1.4900	expression site-associated gene 11 (ESAG11) protein, putative	4	263	7	203	11	-60
Tb927.3.2450	hypothetical protein, conserved	4	264	0	0	4	-264
Tb927.4.3870	receptor-type adenylate cyclase GRESAG 4, putative	4	265	3	268	7	3
Tb927.5.320	receptor-type adenylate cyclase GRESAG 4, putative	4	266	1	494	5	228
Tb927.7.5500	hypothetical protein, conserved	4	267	3	278	7	11
Tb11.1330	hypothetical protein	3	268	1	350	4	82
Tb11.1540	hypothetical protein	3	269	0	0	3	-269
Tb11.v5.0318	hypothetical protein, conserved	3	270	1	356	4	86
Tb11.v5.0320	hypothetical protein, conserved	3	271	0	0	3	-271
Tb11.v5.0658	hypothetical protein, conserved	3	272	0	0	3	-272
Tb927.10.11620	calcium-transporting ATPase, putative	3	273	0	0	3	-273
Tb927.10.12410	hypothetical protein, conserved	3	274	0	0	3	-274
Tb927.10.12510	P-type H+-ATPase, putative	3	275	0	0	3	-275
Tb927.10.1480	hypothetical protein	3	276	3	256	6	-20
Tb927.10.5180	TPR-repeat-containing chaperone protein DNAJ, putative	3	277	9	183	12	-94
Tb927.11.12480	kinetoplastid-specific phospho-protein phosphatase, putative	3	278	3	258	6	-20
Tb927.11.14100	DRBD4	3	279	0	0	3	-279
Tb927.11.16610	hypothetical protein, conserved	3	280	4	237	7	-43
Tb927.11.19920	variant surface glycoprotein (VSG, pseudogene), putative	3	281	0	0	3	-281
Tb927.1.1430	hypothetical protein, unlikely	3	282	0	0	3	-282
Tb927.1.20	expression site-associated gene (ESAG, pseudogene), putative	3	283	0	0	3	-283
Tb927.1.275	expression site-associated gene (ESAG, pseudogene), putative	3	284	2	310	5	26
Tb927.1.330	retrotransposon hot spot protein (RHS, pseudogene), putative	3	285	0	0	3	-285
Tb927.2.3620	GTP-binding elongation factor Tu family, putative	3	286	6	215	9	-71
Tb927.2.6320	adenosine transporter 2, putative	3	287	0	0	3	-287
Tb927.3.4690	hypothetical protein, conserved	3	288	0	0	3	-288
Tb927.3.4710	hypothetical protein, conserved	3	289	6	217	9	-72
Tb927.3.5880	variant surface glycoprotein (VSG, pseudogene), putative	3	290	1	476	4	186
Tb927.4.230	DNA-directed RNA polymerase III subunit, pseudogene, putative	3	291	0	0	3	-291
Tb927.4.2340	hypothetical protein, conserved	3	292	1	480	4	188
Tb927.4.5720	variant surface glycoprotein (VSG, pseudogene), putative	3	293	3	269	6	-24
Tb927.5.4550	receptor-type adenylate cyclase GRESAG 4, putative	3	294	1	500	4	206
Tb927.5.4560	guanine deaminase, putative	3	295	4	250	7	-45
Tb927.5.4720	expression site-associated gene (ESAG, pseudogene), putative	3	296	0	0	3	-296
Tb927.5.4880	variant surface glycoprotein (VSG, pseudogene), putative	3	297	1	501	4	204
Tb927.5.5500	Variant Surface Glycoprotein, putative	3	298	0	0	3	-298
Tb927.6.640	kinetoplastid-specific phospho-protein phosphatase, putative	3	299	2	328	5	29
Tb927.8.1370	hypothetical protein, conserved	3	300	3	280	6	-20
Tb927.9.10990	hypothetical protein	3	301	0	0	3	-301
Tb927.9.12190	hypothetical protein, unlikely	3	302	1	533	4	231
Tb927.9.3960	hypothetical protein, unlikely	3	303	0	0	3	-303
Tb927.9.4130	hypothetical protein, conserved	3	304	3	283	6	-21
Tb11.02.5390	mRNA processing protein, putative	2	305	0	0	2	-305
Tb11.v5.0238	hypothetical protein, conserved	2	306	1	352	3	46
Tb11.v5.0816	expression site-associated gene 2 (ESAG2) protein, putative	2	307	0	0	2	-307
Tb11.v5.0942	variant surface glycoprotein (VSG), putative	2	308	0	0	2	-308
Tb11.v5.0990	hypothetical protein, conserved	2	309	0	0	2	-309
Tb11.v5.1007	hypothetical protein, conserved	2	310	0	0	2	-310
Tb927.10.12730	hypothetical protein	2	311	2	290	4	-21
Tb927.10.13060	hypothetical protein	2	312	2	291	4	-21
Tb927.10.2240	hypothetical protein, conserved	2	313	14	151	16	-162
Tb927.10.3190	hypothetical protein	2	314	0	0	2	-314
Tb927.10.4400	hypothetical protein, conserved	2	315	0	0	2	-315
Tb927.10.4490	hypothetical protein, conserved	2	316	1	390	3	74
Tb927.10.4770	phosphatidylinositol-4-phosphate 5-kinase, putative	2	317	6	210	8	-107
Tb927.10.500	hypothetical protein	2	318	6	211	8	-107
Tb927.10.70	retrotransposon hot spot (RHS), putative, (fragment)	2	319	1	394	3	75
Tb927.11.100	variant surface glycoprotein (VSG), putative	2	320	0	0	2	-320
Tb927.11.11220	dynein heavy chain, putative	2	321	0	0	2	-321
Tb927.11.13100	hypothetical protein, conserved	2	322	9	184	11	-138
Tb927.11.1620	hypothetical protein, conserved	2	323	1	411	3	88
Tb927.11.17810	variant surface glycoprotein (VSG), frameshifted and degenerate	2	324	0	0	2	-324
Tb927.11.17890	expression site-associated gene (ESAG) protein, putative	2	325	1	417	3	92
Tb927.11.18650	expression site-associated gene 1 (ESAG1) protein, putative	2	326	3	260	5	-66
Tb927.11.19810	hypothetical protein	2	327	3	261	5	-66
Tb927.11.20130	variant surface glycoprotein (VSG, pseudogene), putative	2	328	0	0	2	-328
Tb927.11.2710	cell division cycle 45 (CDC45), putative	2	329	1	424	3	95
Tb927.11.3190	hypothetical protein, conserved	2	330	4	241	6	-89
Tb927.1.1450	hypothetical protein, unlikely	2	331	1	428	3	97
Tb927.11.6860	hypothetical protein	2	332	1	433	3	101
Tb927.11.7220	neurobeachin/beige protein, putative	2	333	0	0	2	-333
Tb927.11.8340	hypothetical protein	2	334	2	304	4	-30
Tb927.11.9120	hypothetical protein, conserved	2	335	0	0	2	-335
Tb927.1.2660	hypothetical protein, unlikely	2	336	0	0	2	-336
Tb927.1.2870	hypothetical protein, unlikely	2	337	0	0	2	-337
Tb927.1.4350	hypothetical protein, unlikely	2	338	1	446	3	108
Tb927.1.460	hypothetical protein, unlikely	2	339	8	197	10	-142
Tb927.1.4840	hypothetical protein, unlikely	2	340	1	448	3	108
Tb927.1.60	RNA polymerase (pseudogene), putative	2	341	1	451	3	110
Tb927.1.880	hypothetical protein, conserved	2	342	0	0	2	-342
Tb927.2.1120	retrotransposon hot spot protein (RHS, pseudogene), putative	2	343	0	0	2	-343
Tb927.2.1140	retrotransposon hot spot protein (RHS, pseudogene), putative	2	344	0	0	2	-344
Tb927.2.450	retrotransposon hot spot protein 4 (RHS4), putative	2	345	0	0	2	-345
Tb927.2.490	DNA-directed RNA polymerase, pseudogene, putative	2	346	1	460	3	114
Tb927.3.1300	hypothetical protein, conserved	2	347	1	463	3	116
Tb927.3.2520	expression site-associated gene 1 (ESAG1) protein, putative	2	348	0	0	2	-348
Tb927.3.3210	hypothetical protein	2	349	0	0	2	-349
Tb927.3.3400	kinesin, putative	2	350	5	228	7	-122
Tb927.3.440	variant surface glycoprotein (VSG), putative	2	351	0	0	2	-351
Tb927.4.110	retrotransposon hot spot protein (RHS, pseudogene), putative	2	352	0	0	2	-352
Tb927.4.2130	hypothetical protein, conserved	2	353	1	479	3	126
Tb927.4.3340	hypothetical protein, conserved	2	354	2	316	4	-38
Tb927.4.3790	ubiquitin carboxyl-terminal hydrolase, putative	2	355	0	0	2	-355
Tb927.4.3920	hypothetical protein, conserved	2	356	1	484	3	128
Tb927.4.4640	hypothetical protein, conserved	2	357	0	0	2	-357
Tb927.4.5650	variant surface glycoprotein (VSG, pseudogene), putative	2	358	0	0	2	-358
Tb927.5.3960	arginine N-methyltransferase, type I	2	359	2	322	4	-37
Tb927.5.3970	adenylate kinase, putative	2	360	3	271	5	-89
Tb927.5.710	hypothetical protein, conserved	2	361	0	0	2	-361
Tb927.6.3970	SH3 domain protein, conserved	2	362	0	0	2	-362
Tb927.6.3990	hypothetical protein, conserved	2	363	18	134	20	-229
Tb927.6.4740	importin-alpha re-exporter protein, putative	2	364	2	327	4	-37
Tb927.6.740	ATP-dependent DEAH-box RNA helicase, putative	2	365	0	0	2	-365
Tb927.7.2570	guide RNA associated protein, GAP2	2	366	0	0	2	-366
Tb927.7.3690	hypothetical protein	2	367	1	513	3	146
Tb927.7.6310	polo-like protein kinase	2	368	0	0	2	-368
Tb927.7.6760	hypothetical protein, conserved	2	369	4	252	6	-117
Tb927.7.7470	receptor-type adenylate cyclase GRESAG 4, putative	2	370	0	0	2	-370
Tb927.8.1440	maoC-like dehydratase, putative	2	371	0	0	2	-371
Tb927.8.1720	phosphatidylglycerophosphate synthase, putative	2	372	0	0	2	-372
Tb927.8.260	variant surface glycoprotein (VSG, pseudogene), putative	2	373	0	0	2	-373
Tb927.8.3350	DNA polymerase theta (helicase domain only), putative	2	374	0	0	2	-374
Tb927.8.3540	hypothetical protein, conserved	2	375	0	0	2	-375
Tb927.8.3770	mitogen-activated protein kinase, putative	2	376	0	0	2	-376
Tb927.8.6190	hypothetical protein, conserved	2	377	2	339	4	-38
Tb927.9.17270	variant surface glycoprotein (VSG, pseudogene), putative	2	378	0	0	2	-378
Tb927.9.2140	protein kinase, putative	2	379	0	0	2	-379
Tb927.9.2620	hypothetical protein, conserved	2	380	0	0	2	-380
Tb927.9.3400	endo-beta-N-acetylglucosaminidase, putative	2	381	1	541	3	160
Tb927.9.4040	nicotinamidase, putative	2	382	0	0	2	-382
Tb927.9.4690	hypothetical protein, unlikely	2	383	3	284	5	-99
Tb927.9.7180	adenosine monophosphate deaminase, putative	2	384	0	0	2	-384
Tb11.02.5430	hypothetical protein, conserved	1	385	0	0	1	-385
Tb11.1320	hypothetical protein	1	386	0	0	1	-386
Tb11.1360	hypothetical protein	1	387	0	0	1	-387
Tb11.1550	hypothetical protein	1	388	0	0	1	-388
Tb11.v5.0116	UDP-Gal or UDP-GlcNAc-dependent glycosyltransferase, putative	1	389	0	0	1	-389
Tb11.v5.0129	variant surface protein (VSG), putative	1	390	0	0	1	-390
Tb11.v5.0221	transporter, putative	1	391	0	0	1	-391
Tb11.v5.0239	TPR-repeat-containing chaperone protein DNAJ, putative	1	392	9	181	10	-211
Tb11.v5.0254	pantothenate kinase subunit, putative	1	393	0	0	1	-393
Tb11.v5.0294	retrotransposon hot spot (RHS) protein, putative	1	394	0	0	1	-394
Tb11.v5.0295	retrotransposon hot spot (RHS) protein, putative	1	395	1	355	2	-40
Tb11.v5.0317	hypothetical protein, conserved	1	396	0	0	1	-396
Tb11.v5.0338	hypothetical protein, conserved	1	397	0	0	1	-397
Tb11.v5.0358	hypothetical protein, conserved	1	398	0	0	1	-398
Tb11.v5.0381	hypothetical protein, conserved	1	399	0	0	1	-399
Tb11.v5.0410	antigenic protein, conserved	1	400	0	0	1	-400
Tb11.v5.0484	receptor-type adenylate cyclase GRESAG 4, putative	1	401	4	233	5	-168
Tb11.v5.0519	hypothetical protein, conserved	1	402	1	359	2	-43
Tb11.v5.0532	retrotransposon hot spot (RHS) protein, putative	1	403	4	234	5	-169
Tb11.v5.0625	C-terminal motor kinesin, putative	1	404	0	0	1	-404
Tb11.v5.0669	zinc carboxypeptidase, putative	1	405	0	0	1	-405
Tb11.v5.0683	variant surface glycoprotein (VSG), putative	1	406	0	0	1	-406
Tb11.v5.0712	calcium-transporting ATPase, putative	1	407	0	0	1	-407
Tb11.v5.0766	folate transporter, putative	1	408	0	0	1	-408
Tb11.v5.0910	variant surface glycoprotein (VSG, atypical), putative	1	409	0	0	1	-409
Tb11.v5.0922	UDP-Gal or UDP-GlcNAc-dependent glycosyltransferase, putative	1	410	0	0	1	-410
Tb11.v5.0929	variant surface glycoprotein (VSG, atypical), putative	1	411	0	0	1	-411
Tb11.v5.0983	hypothetical protein, conserved	1	412	0	0	1	-412
Tb11.v5.0987	hypothetical protein, conserved	1	413	0	0	1	-413
Tb11.v5.0988	hypothetical protein, conserved	1	414	0	0	1	-414
Tb11.v5.0989	hypothetical protein, conserved	1	415	0	0	1	-415
Tb11.v5.1000	hypothetical protein, conserved	1	416	0	0	1	-416
Tb11.v5.1003	hypothetical protein, conserved	1	417	0	0	1	-417
Tb11.v5.1006	hypothetical protein, conserved	1	418	0	0	1	-418
Tb11.v5.1020	retrotransposon hot spot (RHS) protein, putative	1	419	0	0	1	-419
Tb11.v5.1046	elongation factor 1-alpha, putative	1	420	0	0	1	-420
Tb927.10.10280	microtubule-associated protein, putative	1	421	0	0	1	-421
Tb927.10.1140	epsilon tubulin	1	422	0	0	1	-422
Tb927.10.11600	hypothetical protein, conserved	1	423	0	0	1	-423
Tb927.10.11980	QA-SNARE protein putative	1	424	0	0	1	-424
Tb927.10.12500	P-type H+-ATPase, putative	1	425	2	289	3	-136
Tb927.10.13380	hypothetical protein, conserved	1	426	0	0	1	-426
Tb927.10.14330	hypothetical protein, conserved	1	427	0	0	1	-427
Tb927.10.14960	hypothetical protein	1	428	0	0	1	-428
Tb927.10.1540	zinc finger protein family member, putative	1	429	0	0	1	-429
Tb927.10.15540	predicted VPS53-like domain protein	1	430	0	0	1	-430
Tb927.10.15760	hypothetical protein, conserved	1	431	0	0	1	-431
Tb927.10.15810	hypothetical protein, conserved	1	432	0	0	1	-432
Tb927.10.16200	hypothetical protein, conserved	1	433	1	378	2	-55
Tb927.10.16470	variant surface glycoprotein (VSG, pseudogene), putative	1	434	0	0	1	-434
Tb927.10.16490	variant surface glycoprotein (VSG), putative	1	435	0	0	1	-435
Tb927.10.1790	hypothetical protein	1	436	0	0	1	-436
Tb927.10.1920	hypothetical protein	1	437	0	0	1	-437
Tb927.10.20	expression site-associated gene (ESAG) protein, putative	1	438	0	0	1	-438
Tb927.10.2700	predicted WD40 repeat protein	1	439	0	0	1	-439
Tb927.10.2950	hypothetical protein, conserved	1	440	1	386	2	-54
Tb927.10.3260	Long-chain-fatty-acid--CoA ligase 5 (EC 6.2.1.3) (Long-chain acyl-CoA synthetase 5) (LACS 5), putative	1	441	0	0	1	-441
Tb927.10.4170	hypothetical protein, conserved	1	442	1	388	2	-54
Tb927.10.4750	hypothetical protein, conserved	1	443	0	0	1	-443
Tb927.10.5190	hypothetical protein	1	444	1	392	2	-52
Tb927.10.5970	predicted tripartite motif protein	1	445	0	0	1	-445
Tb927.10.6700	hypothetical protein, conserved	1	446	0	0	1	-446
Tb927.10.6940	Dipeptidyl-peptidase 8-like, putative	1	447	0	0	1	-447
Tb927.10.7500	fibrillarin	1	448	0	0	1	-448
Tb927.10.7930	2,3-bisphosphoglycerate-independent phosphoglycerate mutase	1	449	0	0	1	-449
Tb927.10.7970	hypothetical protein, conserved	1	450	0	0	1	-450
Tb927.10.8040	adaptin complex 1 subunit, putative	1	451	0	0	1	-451
Tb927.10.810	hypothetical protein, conserved	1	452	0	0	1	-452
Tb927.10.8160	hypothetical protein, conserved	1	453	0	0	1	-453
Tb927.10.8390	hypothetical protein, conserved	1	454	0	0	1	-454
Tb927.10.8510	glucose transporter, putative	1	455	0	0	1	-455
Tb927.10.8600	hypothetical protein, conserved	1	456	0	0	1	-456
Tb927.10.8930	paraflagellar rod component, putative	1	457	0	0	1	-457
Tb927.10.9530	hypothetical protein	1	458	0	0	1	-458
Tb927.10.9620	NADH-ubiquinone oxidoreductase c	1	459	0	0	1	-459
Tb927.10.9630	hypothetical protein	1	460	0	0	1	-460
Tb927.11.10710	hypothetical protein, conserved	1	461	0	0	1	-461
Tb927.11.10760	kinesin-like protein, putative	1	462	0	0	1	-462
Tb927.11.10950	hypothetical protein, conserved	1	463	1	404	2	-59
Tb927.11.11810	hypothetical protein, conserved	1	464	1	406	2	-58
Tb927.11.11900	coatomer gamma subunit, putative	1	465	0	0	1	-465
Tb927.11.11940	protein phosphatase 2A, putative	1	466	0	0	1	-466
Tb927.11.12060	hypothetical protein, conserved	1	467	0	0	1	-467
Tb927.11.12490	hypothetical protein, conserved	1	468	0	0	1	-468
Tb927.11.1290	hypothetical protein, conserved	1	469	0	0	1	-469
Tb927.11.12930	DEAD-box helicase, putative	1	470	0	0	1	-470
Tb927.11.13000	phospholipid-transporting ATPase, putative	1	471	0	0	1	-471
Tb927.11.13160	hypothetical protein	1	472	0	0	1	-472
Tb927.11.14020	RNA-binding protein	1	473	0	0	1	-473
Tb927.11.14790	DNA repair and recombination helicase protein PIF4	1	474	0	0	1	-474
Tb927.1.1150	zeta tubulin	1	475	0	0	1	-475
Tb927.11.15640	mitochondrial RNA binding complex 1 subunit	1	476	0	0	1	-476
Tb927.11.16590	RNA-binding protein, putative	1	477	0	0	1	-477
Tb927.11.17040	expression site-associated gene (ESAG) protein, putative	1	478	0	0	1	-478
Tb927.11.17400	variant surface glycoprotein (VSG), fragment	1	479	0	0	1	-479
Tb927.11.17660	variant surface glycoprotein (VSG), frameshifted and degenerate fragment interrupted	1	480	0	0	1	-480
Tb927.11.18200	hypothetical protein, unlikely	1	481	0	0	1	-481
Tb927.11.18210	variant surface glycoprotein (VSG), frameshifted	1	482	0	0	1	-482
Tb927.11.18570	variant surface glycoprotein (VSG), pseudogene	1	483	4	238	5	-245
Tb927.11.18620	variant surface glycoprotein (VSG), putative	1	484	0	0	1	-484
Tb927.11.18640	variant surface glycoprotein (VSG), putative	1	485	0	0	1	-485
Tb927.11.18990	variant surface glycoprotein (VSG, pseudogene), putative	1	486	0	0	1	-486
Tb927.11.19450	variant surface glycoprotein (VSG), putative	1	487	1	419	2	-68
Tb927.11.19630	variant surface glycoprotein (VSG, pseudogene), putative	1	488	0	0	1	-488
Tb927.11.19830	hypothetical protein	1	489	0	0	1	-489
Tb927.11.19990	variant surface protein (VSG), putative	1	490	0	0	1	-490
Tb927.11.20280	variant surface glycoprotein (VSG), degenerate and frameshifted	1	491	0	0	1	-491
Tb927.11.20640	variant surface glycoprotein (VSG), interrupted	1	492	0	0	1	-492
Tb927.11.20730	glycerophosphoryl diester phosphodiesterase, putative	1	493	0	0	1	-493
Tb927.11.2410	hypothetical protein, conserved	1	494	0	0	1	-494
Tb927.11.2440	hypothetical protein, conserved	1	495	0	0	1	-495
Tb927.11.2530	kinteoplast poly(A) polymerase complex 1 subunit	1	496	0	0	1	-496
Tb927.11.2830	hypothetical protein, conserved	1	497	0	0	1	-497
Tb927.11.2870	hypothetical protein	1	498	0	0	1	-498
Tb927.11.3250	dynein heavy chain, putative	1	499	0	0	1	-499
Tb927.11.330	Nucleoporin	1	500	0	0	1	-500
Tb927.11.3350	phospholipid-transporting ATPase 1-like protein, putative	1	501	0	0	1	-501
Tb927.11.3810	hypothetical protein	1	502	0	0	1	-502
Tb927.11.3960	hypothetical protein, conserved	1	503	0	0	1	-503
Tb927.1.1460	hypothetical protein, unlikely	1	504	2	298	3	-206
Tb927.11.4630	hypothetical protein, conserved	1	505	0	0	1	-505
Tb927.11.5000	dynein intermediate chain IC78, putative	1	506	2	299	3	-207
Tb927.11.5250	hypothetical protein, conserved	1	507	0	0	1	-507
Tb927.11.5630	hypothetical protein, conserved	1	508	0	0	1	-508
Tb927.11.580	lipid-like atypical dual specificity phosphatase, putative	1	509	0	0	1	-509
Tb927.11.5990	hypothetical protein, conserved	1	510	0	0	1	-510
Tb927.11.6430	hypothetical protein, conserved	1	511	1	432	2	-79
Tb927.11.660	hypothetical protein, conserved	1	512	0	0	1	-512
Tb927.11.6680	amino acid permease/transporter, putative	1	513	0	0	1	-513
Tb927.11.670	epsinR	1	514	0	0	1	-514
Tb927.11.6990	protein kinase, putative	1	515	0	0	1	-515
Tb927.1.1710	hypothetical protein, conserved	1	516	2	302	3	-214
Tb927.11.7460	glucose-regulated protein 78, putative	1	517	0	0	1	-517
Tb927.11.7470	hypothetical protein, conserved	1	518	0	0	1	-518
Tb927.11.7860	DNA replication licensing factor MCM2, putative	1	519	0	0	1	-519
Tb927.1.1800	hypothetical protein, unlikely	1	520	0	0	1	-520
Tb927.11.8270	hypothetical protein, conserved	1	521	0	0	1	-521
Tb927.11.8360	hypothetical protein	1	522	2	305	3	-217
Tb927.11.9110	C-terminal motor kinesin, putative	1	523	1	441	2	-82
Tb927.11.9140	mitochondrial RNA binding complex 1 subunit	1	524	0	0	1	-524
Tb927.11.9440	hypothetical protein, conserved	1	525	0	0	1	-525
Tb927.1.1970	hypothetical protein, unlikely	1	526	0	0	1	-526
Tb927.1.2200	hypothetical protein	1	527	2	306	3	-221
Tb927.1.2630	hypothetical protein, unlikely	1	528	2	308	3	-220
Tb927.1.2720	hypothetical protein, unlikely	1	529	2	309	3	-220
Tb927.1.2780	hypothetical protein	1	530	0	0	1	-530
Tb927.1.3160	hypothetical protein, unlikely	1	531	2	312	3	-219
Tb927.1.320	retrotransposon hot spot protein (RHS, pseudogene), putative	1	532	0	0	1	-532
Tb927.1.3410	hypothetical protein, conserved	1	533	0	0	1	-533
Tb927.1.3460	hypothetical protein, unlikely	1	534	0	0	1	-534
Tb927.1.3810	hypothetical protein, conserved	1	535	0	0	1	-535
Tb927.1.4050	protein phosphatase with EF-Hand domains (PPEF)	1	536	0	0	1	-536
Tb927.1.4130	hypothetical protein, unlikely	1	537	0	0	1	-537
Tb927.1.4550	hypothetical protein, conserved	1	538	0	0	1	-538
Tb927.1.5090	expression site-associated gene (ESAG, pseudogene), putative	1	539	0	0	1	-539
Tb927.1.760	hypothetical protein, conserved	1	540	0	0	1	-540
Tb927.1.90	retrotransposon hot spot protein (RHS, pseudogene), putative	1	541	0	0	1	-541
Tb927.2.1380	leucine-rich repeat protein (LRRP), putative	1	542	0	0	1	-542
Tb927.2.2160	paraflagellar rod component, putative	1	543	0	0	1	-543
Tb927.2.2950	hypothetical protein, conserved	1	544	0	0	1	-544
Tb927.2.400	retrotransposon hot spot protein 2 (RHS2), putative	1	545	9	188	10	-357
Tb927.2.4520	hypothetical protein, conserved	1	546	0	0	1	-546
Tb927.2.460	DNA-directed RNA polymerase, pseudogene, putative	1	547	0	0	1	-547
Tb927.2.4720	dolichyl-P-Man:GDP-Man7GlcNAc2-PP-dolichyl alpha-1,6-mannosyltransferase, putative	1	548	0	0	1	-548
Tb927.2.5030	transcription initiation protein, putative	1	549	0	0	1	-549
Tb927.2.5060	GTP binding protein, putative	1	550	0	0	1	-550
Tb927.2.5610	hypothetical protein, conserved	1	551	0	0	1	-551
Tb927.2.6372	variant surface glycoprotein (VSG, pseudogene), putative	1	552	0	0	1	-552
Tb927.3.1060	cAMP response protein, putative	1	553	0	0	1	-553
Tb927.3.130	variant surface glycoprotein (VSG, pseudogene), putative	1	554	0	0	1	-554
Tb927.3.1430	chaperone protein DNAj, putative	1	555	12	166	13	-389
Tb927.3.1560	hypothetical protein, conserved	1	556	0	0	1	-556
Tb927.3.1650	hypothetical protein	1	557	0	0	1	-557
Tb927.3.1790	pyruvate dehydrogenase E1 beta subunit, putative	1	558	1	465	2	-93
Tb927.3.2170	translation elongation factor EF-2, putative	1	559	2	314	3	-245
Tb927.3.2810	hypothetical protein, conserved	1	560	0	0	1	-560
Tb927.3.2950	ribonuclease inhibitor- like protein	1	561	0	0	1	-561
Tb927.3.2980	mitochondrial carrier protein	1	562	0	0	1	-562
Tb927.3.3050	hypothetical protein, conserved	1	563	0	0	1	-563
Tb927.3.3170	hypothetical protein, conserved	1	564	0	0	1	-564
Tb927.3.320	variant surface glycoprotein (VSG, pseudogene), putative	1	565	0	0	1	-565
Tb927.3.3390	kinesin, putative	1	566	1	468	2	-98
Tb927.3.370	variant surface glycoprotein (VSG, atypical), putative	1	567	0	0	1	-567
Tb927.3.430	expression site-associated gene (ESAG, pseudogene), putative	1	568	0	0	1	-568
Tb927.3.4510	hypothetical protein, conserved	1	569	0	0	1	-569
Tb927.3.5060	hypothetical protein, conserved	1	570	0	0	1	-570
Tb927.3.5090	tryparedoxin, putative	1	571	0	0	1	-571
Tb927.3.5820	expression site-associated gene (ESAG, pseudogene), putative	1	572	1	475	2	-97
Tb927.3.930	dynein heavy chain, putative	1	573	0	0	1	-573
Tb927.4.1200	expression site-associated gene (ESAG) protein, putative	1	574	0	0	1	-574
Tb927.4.130	receptor-type adenylate cyclase GRESAG 4, pseudogene, putative	1	575	3	266	4	-309
Tb927.4.2070	antigenic protein, putative	1	576	0	0	1	-576
Tb927.4.2140	MBO2	1	577	0	0	1	-577
Tb927.4.2290	glucose transporter, putative	1	578	0	0	1	-578
Tb927.4.2570	hypothetical protein, conserved	1	579	0	0	1	-579
Tb927.4.2800	hypothetical protein, conserved	1	580	0	0	1	-580
Tb927.4.4140	hypothetical protein, conserved	1	581	0	0	1	-581
Tb927.4.4560	hypothetical protein, conserved	1	582	0	0	1	-582
Tb927.4.4780	hypothetical protein	1	583	1	488	2	-95
Tb927.4.4900	hypothetical protein	1	584	0	0	1	-584
Tb927.4.5600	variant surface glycoprotein (VSG, pseudogene), putative	1	585	0	0	1	-585
Tb927.4.5790	UDP-Gal or UDP-GlcNAc-dependent glycosyltransferase, putative	1	586	0	0	1	-586
Tb927.4.870	dynein heavy chain, putative	1	587	0	0	1	-587
Tb927.5.1120	hypothetical protein, conserved	1	588	0	0	1	-588
Tb927.5.1440	hypothetical protein	1	589	0	0	1	-589
Tb927.5.1990	hypothetical protein, conserved	1	590	1	490	2	-100
Tb927.5.2510	hypothetical protein, conserved	1	591	0	0	1	-591
Tb927.5.2570	translation initiation factor, putative	1	592	0	0	1	-592
Tb927.5.270	variant surface glycoprotein (VSG, pseudogene), putative	1	593	0	0	1	-593
Tb927.5.2900	histone deacetylase 4	1	594	0	0	1	-594
Tb927.5.330	receptor-type adenylate cyclase GRESAG 4, putative	1	595	1	496	2	-99
Tb927.5.3940	helicase, putative	1	596	0	0	1	-596
Tb927.5.3950	hypothetical protein, conserved	1	597	1	497	2	-100
Tb927.5.4070	hypothetical protein, conserved	1	598	2	323	3	-275
Tb927.5.4080	hypothetical protein, conserved	1	599	1	498	2	-101
Tb927.5.4130	hypothetical protein, conserved	1	600	0	0	1	-600
Tb927.5.4660	expression site-associated gene (ESAG, pseudogene), putative	1	601	0	0	1	-601
Tb927.5.500	hypothetical protein, conserved	1	602	0	0	1	-602
Tb927.5.5490	Variant Surface Glycoprotein, putative	1	603	0	0	1	-603
Tb927.5.950	monothiol glutaredoxin, putative	1	604	1	503	2	-101
Tb927.5.980	hypothetical protein, conserved	1	605	0	0	1	-605
Tb927.6.1010	cysteine peptidase precursor	1	606	0	0	1	-606
Tb927.6.1100	hypothetical protein, conserved	1	607	0	0	1	-607
Tb927.6.170	receptor-type adenylate cyclase GRESAG 4, putative	1	608	3	274	4	-334
Tb927.6.1790	hypothetical protein	1	609	1	505	2	-104
Tb927.6.1840	hypothetical protein, conserved	1	610	0	0	1	-610
Tb927.6.2550	RNA-binding protein, putative	1	611	3	275	4	-336
Tb927.6.2870	hypothetical protein, conserved	1	612	0	0	1	-612
Tb927.6.3000	fatty acid desaturase, putative	1	613	0	0	1	-613
Tb927.6.3310	calpain-like cysteine peptidase, putative	1	614	0	0	1	-614
Tb927.6.3460	hypothetical protein, conserved	1	615	0	0	1	-615
Tb927.6.3960	hypothetical protein, conserved	1	616	0	0	1	-616
Tb927.6.4450	hypothetical protein, conserved	1	617	0	0	1	-617
Tb927.6.5190	DNA-directed RNA polymerase III, pseudogene, putative	1	618	0	0	1	-618
Tb927.6.5290	variant surface glycoprotein (VSG, pseudogene), putative	1	619	0	0	1	-619
Tb927.6.5350	variant surface glycoprotein (VSG, pseudogene), putative	1	620	0	0	1	-620
Tb927.6.5410	variant surface glycoprotein (VSG, pseudogene), putative	1	621	0	0	1	-621
Tb927.6.5610	variant surface glycoprotein (VSG, pseudogene), putative	1	622	0	0	1	-622
Tb927.6.5730	variant surface glycoprotein (VSG, pseudogene), putative	1	623	0	0	1	-623
Tb927.6.750	kinetoplastid-specific phospho-protein phosphatase, putative	1	624	0	0	1	-624
Tb927.6.980	cysteine peptidase precursor	1	625	1	510	2	-115
Tb927.7.2580	zinc finger protein family member, putative	1	626	0	0	1	-626
Tb927.7.3010	hypothetical protein, conserved	1	627	0	0	1	-627
Tb927.7.3290	hypothetical protein, conserved	1	628	0	0	1	-628
Tb927.7.3720	hypothetical protein	1	629	2	330	3	-299
Tb927.7.3860	hypothetical protein, conserved	1	630	0	0	1	-630
Tb927.7.4230	hypothetical protein, conserved	1	631	0	0	1	-631
Tb927.7.4280	hypothetical protein, conserved	1	632	0	0	1	-632
Tb927.7.4400	inositol polyphosphate kinase-like protein, putative	1	633	0	0	1	-633
Tb927.7.5860	hypothetical protein	1	634	0	0	1	-634
Tb927.7.6320	hypothetical protein, conserved	1	635	1	516	2	-119
Tb927.7.6590	hypothetical protein, conserved	1	636	0	0	1	-636
Tb927.7.6820	hypothetical protein, conserved	1	637	0	0	1	-637
Tb927.7.6900	double-strand-break repair protein rad21 homolog, putative	1	638	2	332	3	-306
Tb927.7.6980	hypothetical protein, conserved	1	639	0	0	1	-639
Tb927.7.7430	ATP synthase alpha chain, mitochondrial precursor	1	640	0	0	1	-640
Tb927.7.780	hypothetical protein, conserved	1	641	0	0	1	-641
Tb927.8.1000	hypothetical protein, conserved	1	642	0	0	1	-642
Tb927.8.1010	chaperone protein DNAj, putative	1	643	0	0	1	-643
Tb927.8.1390	hypothetical protein, conserved (pseudogene)	1	644	0	0	1	-644
Tb927.8.1650	Protein Associated with Differentiation, putative	1	645	0	0	1	-645
Tb927.8.1680	hypothetical protein, conserved	1	646	0	0	1	-646
Tb927.8.230	expression site-associated gene (ESAG, pseudogene), putative	1	647	0	0	1	-647
Tb927.8.2320	hypothetical protein	1	648	0	0	1	-648
Tb927.8.2370	dicer-like protein	1	649	0	0	1	-649
Tb927.8.3180	hypothetical protein, conserved	1	650	0	0	1	-650
Tb927.8.3410	hypothetical protein, conserved	1	651	0	0	1	-651
Tb927.8.3430	hypothetical protein, conserved	1	652	14	156	15	-496
Tb927.8.3440	hypothetical protein, conserved	1	653	1	522	2	-131
Tb927.8.3790	paraflagellar rod component, putative	1	654	0	0	1	-654
Tb927.8.4170	RNA-binding protein, putative	1	655	0	0	1	-655
Tb927.8.4230	hypothetical protein, conserved	1	656	0	0	1	-656
Tb927.8.4380	hypothetical protein, conserved	1	657	0	0	1	-657
Tb927.8.4830	U170K U1 small nuclear ribonucleoprotein, putative	1	658	0	0	1	-658
Tb927.8.5130	hypothetical protein, conserved	1	659	0	0	1	-659
Tb927.8.5580	hypothetical protein, conserved	1	660	1	527	2	-133
Tb927.8.5850	hypothetical protein, conserved	1	661	0	0	1	-661
Tb927.8.5950	protein kinase, putative	1	662	0	0	1	-662
Tb927.8.6290	hypothetical protein, conserved	1	663	0	0	1	-663
Tb927.8.6560	hypothetical protein, conserved	1	664	2	341	3	-323
Tb927.8.6580	succinate dehydrogenase flavoprotein, putative	1	665	0	0	1	-665
Tb927.8.6720	hypothetical protein, conserved	1	666	0	0	1	-666
Tb927.8.6960	hypothetical protein, conserved	1	667	0	0	1	-667
Tb927.8.7100	acetyl-CoA carboxylase	1	668	1	529	2	-139
Tb927.8.730	nucleolar RNA-binding protein, putative	1	669	0	0	1	-669
Tb927.9.11560	hypothetical protein, conserved	1	670	0	0	1	-670
Tb927.9.14420	cyclophilin-like protein, putative	1	671	0	0	1	-671
Tb927.9.14650	SLACS retrotransposable element (part), putative	1	672	0	0	1	-672
Tb927.9.16940	variant surface glycoprotein (VSG, pseudogene), putative	1	673	0	0	1	-673
Tb927.9.17080	variant surface glycoprotein (VSG, pseudogene), putative	1	674	0	0	1	-674
Tb927.9.17360	variant surface glycoprotein (VSG, pseudogene), putative	1	675	0	0	1	-675
Tb927.9.17890	variant surface glycoprotein (VSG, pseudogene), putative	1	676	18	136	19	-540
Tb927.9.2250	hypothetical protein, conserved	1	677	0	0	1	-677
Tb927.9.2590	hypothetical protein, conserved	1	678	0	0	1	-678
Tb927.9.2630	hypothetical protein, conserved	1	679	1	539	2	-140
Tb927.9.3970	nicotinamidase, putative	1	680	1	543	2	-137
Tb927.9.4120	hypothetical protein, unlikely	1	681	0	0	1	-681
Tb927.9.510	variant surface glycoprotein (VSG, pseudogene), putative	1	682	0	0	1	-682
Tb927.9.560	expression site-associated gene 3 (ESAG3), pseudogene	1	683	0	0	1	-683
Tb927.9.630	variant surface glycoprotein (VSG, pseudogene), putative	1	684	0	0	1	-684
Tb927.9.7530	hypothetical protein, unlikely	1	685	0	0	1	-685
Tb927.9.8290	hypothetical protein, conserved	1	686	0	0	1	-686
Tb927.9.8780	tRNA nucleotidyltransferase, putative	1	687	0	0	1	-687
Tb927.9.9880	hypothetical protein, unlikely	1	688	0	0	1	-688
Tb927.7.3280	translation initiation factor IF-2, putative	0	0	45	90	45	90
Tb927.7.3180	Mu-adaptin 1, putative	0	0	16	143	16	143
Tb927.6.4540	3-hydroxy-3-methylglutaryl-CoA reductase, putative	0	0	11	174	11	174
Tb927.7.6380	ssm4 protein, putative	0	0	10	180	10	180
Tb927.3.4500	fumarate hydratase, class I	0	0	7	205	7	205
Tb927.6.180	receptor-type adenylate cyclase GRESAG 4, putative	0	0	7	206	7	206
Tb927.8.5290	hypothetical protein, conserved	0	0	7	208	7	208
Tb927.11.4380	ATP-dependent RNA helicase, putative	0	0	6	213	6	213
Tb927.3.4220	Zn-finger domain protein, putative	0	0	6	216	6	216
Tb927.8.1450	hypothetical protein, conserved	0	0	6	218	6	218
Tb11.v5.0456	receptor-type adenylate cyclase GRESAG 4, putative	0	0	4	232	4	232
Tb927.11.1130	calpain-like cysteine peptidase, putative	0	0	4	235	4	235
Tb927.11.7060	acidocalcisomal pyrophosphatase	0	0	4	243	4	243
Tb927.1.4370	hypothetical protein, conserved	0	0	4	245	4	245
Tb927.3.4270	hypothetical protein, conserved	0	0	4	247	4	247
Tb927.9.5330	hypothetical protein, conserved	0	0	4	253	4	253
Tb927.10.13260	hypothetical protein, conserved	0	0	3	255	3	255
Tb927.1.4790	hypothetical protein, unlikely	0	0	3	264	3	264
Tb927.4.1520	hypothetical protein, conserved	0	0	3	267	3	267
Tb927.5.3880	hypothetical protein, conserved	0	0	3	270	3	270
Tb927.5.4750	variant surface glycoprotein (VSG, pseudogene), putative	0	0	3	272	3	272
Tb927.6.1040	cysteine peptidase precursor	0	0	3	273	3	273
Tb11.v5.0281	receptor-type adenylate cyclase GRESAG 4, putative	0	0	2	286	2	286
Tb11.v5.0409	guanine deaminase, putative	0	0	2	287	2	287
Tb927.10.15360	hypothetical protein, conserved	0	0	2	292	2	292
Tb927.10.2480	hypothetical protein, conserved	0	0	2	293	2	293
Tb927.10.8080	hypothetical protein, conserved	0	0	2	294	2	294
Tb927.11.10410	hypothetical protein, conserved	0	0	2	295	2	295
Tb927.11.15400	hypothetical protein, conserved	0	0	2	296	2	296
Tb927.11.7000	hypothetical protein, conserved	0	0	2	301	2	301
Tb927.1.1720	cyclophilin 15, putative	0	0	2	303	2	303
Tb927.1.3140	hypothetical protein, unlikely	0	0	2	311	2	311
Tb927.2.200	expression site-associated gene (ESAG, pseudogene), putative	0	0	2	313	2	313
Tb927.4.1680	ZFP family member, putative	0	0	2	315	2	315
Tb927.4.3350	hypothetical protein, conserved	0	0	2	317	2	317
Tb927.4.3940	calpain-like cysteine peptidase, putative	0	0	2	318	2	318
Tb927.4.3990	amino acid transporter, putative	0	0	2	319	2	319
Tb927.4.4000	amino acid transporter, putative	0	0	2	320	2	320
Tb927.5.1870	metalloprotease, putative	0	0	2	321	2	321
Tb927.5.4140	hypothetical protein, conserved	0	0	2	324	2	324
Tb927.5.5410	Variant Surface Glycoprotein, putative	0	0	2	325	2	325
Tb927.6.3670	paraflagellar rod component, putative	0	0	2	326	2	326
Tb927.7.1990	retrotransposon hot spot protein (RHS, pseudogene), putative	0	0	2	329	2	329
Tb927.7.6440	vesicle transport v-SNARE protein, putative	0	0	2	331	2	331
Tb927.7.810	hypothetical protein, conserved	0	0	2	333	2	333
Tb927.8.1590	ubiquitin-protein ligase, putative	0	0	2	334	2	334
Tb927.8.4640	flagellar protofilament ribbon protein, putative	0	0	2	335	2	335
Tb927.8.4660	hypothetical protein, conserved	0	0	2	336	2	336
Tb927.8.6420	beta-ketoacyl-ACP reductase 2	0	0	2	340	2	340
Tb927.9.1050	variant surface glycoprotein (VSG), putative	0	0	2	343	2	343
Tb927.9.15260	hypothetical protein, conserved	0	0	2	344	2	344
Tb927.9.2210	hypothetical protein, unlikely	0	0	2	346	2	346
Tb927.9.660	expression site-associated gene (ESAG) protein	0	0	2	347	2	347
Tb11.02.5380b	exosome complex exonuclease RRP44p homologue, putative	0	0	1	348	1	348
Tb11.02.5440	hypothetical protein, conserved	0	0	1	349	1	349
Tb11.v5.0222	NADH-ubiquinone oxidoreductase, mitochondrial, putative	0	0	1	351	1	351
Tb11.v5.0241	dynein heavy chain, putative	0	0	1	353	1	353
Tb11.v5.0289	ubiquitin ligase, putative	0	0	1	354	1	354
Tb11.v5.0325	retrotransposon hot spot (RHS) protein, putative	0	0	1	357	1	357
Tb11.v5.0339	hypothetical protein, conserved	0	0	1	358	1	358
Tb11.v5.0629	fumarate hydratase, putative	0	0	1	361	1	361
Tb11.v5.0793	hypothetical protein, conserved	0	0	1	362	1	362
Tb11.v5.0807	ribonuclease, putative	0	0	1	363	1	363
Tb11.v5.0845	hypothetical protein, conserved	0	0	1	364	1	364
Tb11.v5.0938	variant surface glycoprotein (VSG, atypical), putative	0	0	1	365	1	365
Tb11.v5.1011	calpain-like cysteine peptidase, putative	0	0	1	366	1	366
Tb927.10.10450	hypothetical protein	0	0	1	368	1	368
Tb927.10.11360	protein phosphatase 2A regulatory subunit, putative	0	0	1	369	1	369
Tb927.10.11440	CYC2-like cyclin, putative	0	0	1	370	1	370
Tb927.10.1180	hypothetical protein, conserved	0	0	1	371	1	371
Tb927.10.12740	zinc finger protein family memeber, putative	0	0	1	373	1	373
Tb927.10.14880	hypothetical protein, conserved	0	0	1	374	1	374
Tb927.10.15050	hypothetical protein	0	0	1	375	1	375
Tb927.10.1510	NOT1	0	0	1	376	1	376
Tb927.10.15620	hypothetical protein	0	0	1	377	1	377
Tb927.10.16210	hypothetical protein, conserved	0	0	1	379	1	379
Tb927.10.1700	hypothetical protein, conserved	0	0	1	380	1	380
Tb927.10.1840	hypothetical protein, conserved	0	0	1	381	1	381
Tb927.10.2250	ubiquitin-conjugating enzyme variant Kua homologue, putative	0	0	1	382	1	382
Tb927.10.2360	hypothetical protein	0	0	1	383	1	383
Tb927.10.2520	hypothetical protein, conserved	0	0	1	385	1	385
Tb927.10.3510	hypothetical protein, conserved	0	0	1	387	1	387
Tb927.10.4410	hypothetical protein	0	0	1	389	1	389
Tb927.10.5160	hypothetical protein	0	0	1	391	1	391
Tb927.10.5850	hypothetical protein, conserved	0	0	1	393	1	393
Tb927.10.8800	hypothetical protein, conserved	0	0	1	395	1	395
Tb927.10.9510	hypothetical protein	0	0	1	396	1	396
Tb927.10.9910	hypothetical protein, conserved	0	0	1	397	1	397
Tb927.1.100	RNA polymerase (pseudogene), putative	0	0	1	398	1	398
Tb927.1.110	hypothetical protein, conserved	0	0	1	399	1	399
Tb927.11.10140	hypothetical protein, conserved	0	0	1	400	1	400
Tb927.11.10400	hypothetical protein, conserved	0	0	1	401	1	401
Tb927.11.10550	hypothetical protein, conserved	0	0	1	402	1	402
Tb927.11.10780	hypothetical protein, conserved	0	0	1	403	1	403
Tb927.11.11090	Nucleoporin	0	0	1	405	1	405
Tb927.11.1430	hypothetical protein, conserved	0	0	1	407	1	407
Tb927.11.14680	phosphatidylinositol 3-related kinase, putative	0	0	1	408	1	408
Tb927.11.15310	hypothetical protein, conserved	0	0	1	409	1	409
Tb927.11.16120	hypothetical protein, conserved	0	0	1	410	1	410
Tb927.11.1630	hypothetical protein, conserved	0	0	1	412	1	412
Tb927.11.16340	hypothetical protein, conserved	0	0	1	413	1	413
Tb927.11.1660	vesicular transport protein (CDC48 homologue), putative	0	0	1	414	1	414
Tb927.11.16600	exosome-associated protein 2	0	0	1	415	1	415
Tb927.11.17670	variant surface glycoprotein (VSG), degenerate	0	0	1	416	1	416
Tb927.11.19220	variant surface glycoprotein (VSG, pseudogene), putative	0	0	1	418	1	418
Tb927.11.19510	variant surface glycoprotein (VSG, pseudogene), putative	0	0	1	420	1	420
Tb927.11.2700	hypothetical protein, conserved	0	0	1	423	1	423
Tb927.11.370	repressor activator protein 1	0	0	1	425	1	425
Tb927.1.1410	hypothetical protein, unlikely	0	0	1	426	1	426
Tb927.11.4310	hypothetical protein	0	0	1	427	1	427
Tb927.1.1510	hypothetical protein, unlikely	0	0	1	430	1	430
Tb927.11.5780	mitochondrial DNA-directed RNA polymerase	0	0	1	431	1	431
Tb927.11.6880	hypothetical protein	0	0	1	434	1	434
Tb927.11.7050	hypothetical protein, conserved	0	0	1	435	1	435
Tb927.11.7090	hypothetical protein, conserved	0	0	1	436	1	436
Tb927.11.7500	hypothetical protein, conserved	0	0	1	437	1	437
Tb927.11.7980	hypothetical protein	0	0	1	438	1	438
Tb927.1.1820	hypothetical protein, conserved	0	0	1	439	1	439
Tb927.1.1860	hypothetical protein, unlikely	0	0	1	440	1	440
Tb927.11.9380	hypothetical protein	0	0	1	442	1	442
Tb927.1.2290	hypothetical protein, unlikely	0	0	1	443	1	443
Tb927.1.3030	KREL2	0	0	1	444	1	444
Tb927.1.3940	hypothetical protein, conserved	0	0	1	445	1	445
Tb927.1.4590	hypothetical protein, conserved	0	0	1	447	1	447
Tb927.1.5120	expression site-associated gene (ESAG) protein, putative	0	0	1	449	1	449
Tb927.1.5210	hypothetical protein, unlikely	0	0	1	450	1	450
Tb927.1.70	retrotransposon hot spot protein 4 (RHS4), putative	0	0	1	452	1	452
Tb927.2.1110	DNA-directed RNA polymerase III subunit 2, pseudogene, putative	0	0	1	453	1	453
Tb927.2.1200	DNA-directed RNA polymerase III subunit 2, pseudogene, putative	0	0	1	454	1	454
Tb927.2.150	hypothetical protein	0	0	1	455	1	455
Tb927.2.1760	hypothetical protein, conserved	0	0	1	456	1	456
Tb927.2.2390	hypothetical protein, conserved	0	0	1	457	1	457
Tb927.2.4440	hypothetical protein	0	0	1	458	1	458
Tb927.2.470	retrotransposon hot spot protein 4 (RHS4), putative	0	0	1	459	1	459
Tb927.2.5080	hypothetical protein, conserved	0	0	1	461	1	461
Tb927.2.540	DNA-directed RNA polymerase, pseudogene, putative	0	0	1	462	1	462
Tb927.3.1620	hypothetical protein, conserved	0	0	1	464	1	464
Tb927.3.2130	hypothetical protein, conserved	0	0	1	466	1	466
Tb927.3.2470	pumilio RNA binding protein, putative	0	0	1	467	1	467
Tb927.3.4210	hypothetical protein, conserved	0	0	1	469	1	469
Tb927.3.4590	hypothetical protein, conserved	0	0	1	470	1	470
Tb927.3.4700.1	hypothetical protein, conserved	0	0	1	471	1	471
Tb927.3.4760	dynamin, putative	0	0	1	472	1	472
Tb927.3.560	expression site-associated gene (ESAG) protein, putative	0	0	1	473	1	473
Tb927.3.5690	hypothetical protein, conserved	0	0	1	474	1	474
Tb927.4.1500	RNA editing associated helicase 2	0	0	1	477	1	477
Tb927.4.1920	GPI transamidase, putative	0	0	1	478	1	478
Tb927.4.2410	hypothetical protein, conserved	0	0	1	481	1	481
Tb927.4.2920	hypothetical protein, conserved	0	0	1	482	1	482
Tb927.4.3810	DNA-directed RNA polymerase II subunit 2, putative	0	0	1	483	1	483
Tb927.4.400	RNA-binding protein, putative	0	0	1	485	1	485
Tb927.4.4230	RNA-binding protein, putative	0	0	1	486	1	486
Tb927.4.4520	hypothetical protein, conserved	0	0	1	487	1	487
Tb927.4.5730	variant surface glycoprotein (VSG, pseudogene), putative	0	0	1	489	1	489
Tb927.5.2140	regulator of nonsense transcripts UPF1	0	0	1	491	1	491
Tb927.5.2380	hydrolase, alpha/beta fold family, putative	0	0	1	492	1	492
Tb927.5.2740	hypothetical protein, conserved	0	0	1	493	1	493
Tb927.5.3280	hypothetical protein, conserved	0	0	1	495	1	495
Tb927.5.4540	receptor-type adenylate cyclase GRESAG 4, putative	0	0	1	499	1	499
Tb927.5.490	methyltransferase, putative	0	0	1	502	1	502
Tb927.6.1020	cysteine peptidase precursor	0	0	1	504	1	504
Tb927.6.300	receptor-type adenylate cyclase GRESAG 4, putative	0	0	1	506	1	506
Tb927.6.3190	hypothetical protein, conserved	0	0	1	507	1	507
Tb927.6.5740	variant surface glycoprotein (VSG, atypical), putative	0	0	1	508	1	508
Tb927.6.810	hypothetical protein	0	0	1	509	1	509
Tb927.7.2370	40S ribosomal protein S15, putative	0	0	1	511	1	511
Tb927.7.3600	hypothetical protein, conserved	0	0	1	512	1	512
Tb927.7.4070	calpain-like cysteine peptidase, putative	0	0	1	514	1	514
Tb927.7.5520	hypothetical protein, conserved	0	0	1	515	1	515
Tb927.7.6810	hypothetical protein, conserved	0	0	1	518	1	518
Tb927.7.7410	oxidoreductase, putative	0	0	1	519	1	519
Tb927.8.2600	hypothetical protein, conserved	0	0	1	520	1	520
Tb927.8.3300	hypothetical protein, conserved	0	0	1	521	1	521
Tb927.8.3680	hypothetical protein, conserved	0	0	1	523	1	523
Tb927.8.4160	hypothetical protein, conserved	0	0	1	525	1	525
Tb927.8.5340	hypothetical protein	0	0	1	526	1	526
Tb927.8.7860	receptor-type adenylate cyclase GRESAG 4, putative	0	0	1	530	1	530
Tb927.9.10590	hypothetical protein, unlikely	0	0	1	531	1	531
Tb927.9.10600	hypothetical protein, unlikely	0	0	1	532	1	532
Tb927.9.14250	hypothetical protein, unlikely	0	0	1	534	1	534
Tb927.9.14520	hypothetical protein, unlikely	0	0	1	535	1	535
Tb927.9.15390	hypothetical protein, unlikely	0	0	1	536	1	536
Tb927.9.16490	variant surface glycoprotein (VSG), putative	0	0	1	537	1	537
Tb927.9.16570	variant surface glycoprotein (VSG, pseudogene), putative	0	0	1	538	1	538
Tb927.9.2750	hypothetical protein, unlikely	0	0	1	540	1	540
Tb927.9.3880	hypothetical protein, conserved	0	0	1	542	1	542
Tb927.9.6830	hypothetical protein	0	0	1	545	1	545
Tb927.9.9490	hypothetical protein, unlikely	0	0	1	547	1	547
Tb927.9.9500	hypothetical protein, unlikely	0	0	1	548	1	548
